# Supplementary material for: The NKCC1 antagonist bumetanide mitigates interneuronopathy associated with ethanol exposure in utero
Source: eLife journal article supplement (doi:10.7554/elife.48648), 2019-09-23
Supplement: supp [file elife-48648-supp-v1.zip]

Archive with 5 entries (5 files):
- elife_poa_e48648_Figure_2_figure_supplement_1.tif
- elife_poa_e48648_Figure_1_figure_supplement_2.tif
- elife_poa_e48648_Figure_1_figure_supplement_1.tif
- elife_poa_e48648_Figure_2_figure_supplement_2.tif
- elife_poa_e48648_Transparent_Reporting_File.pdf
