# Supplementary figures and images for: The NKCC1 antagonist bumetanide mitigates interneuronopathy associated with ethanol exposure in utero
Source: eLife journal article supplement (doi:10.7554/elife.48648), 2019-09-23

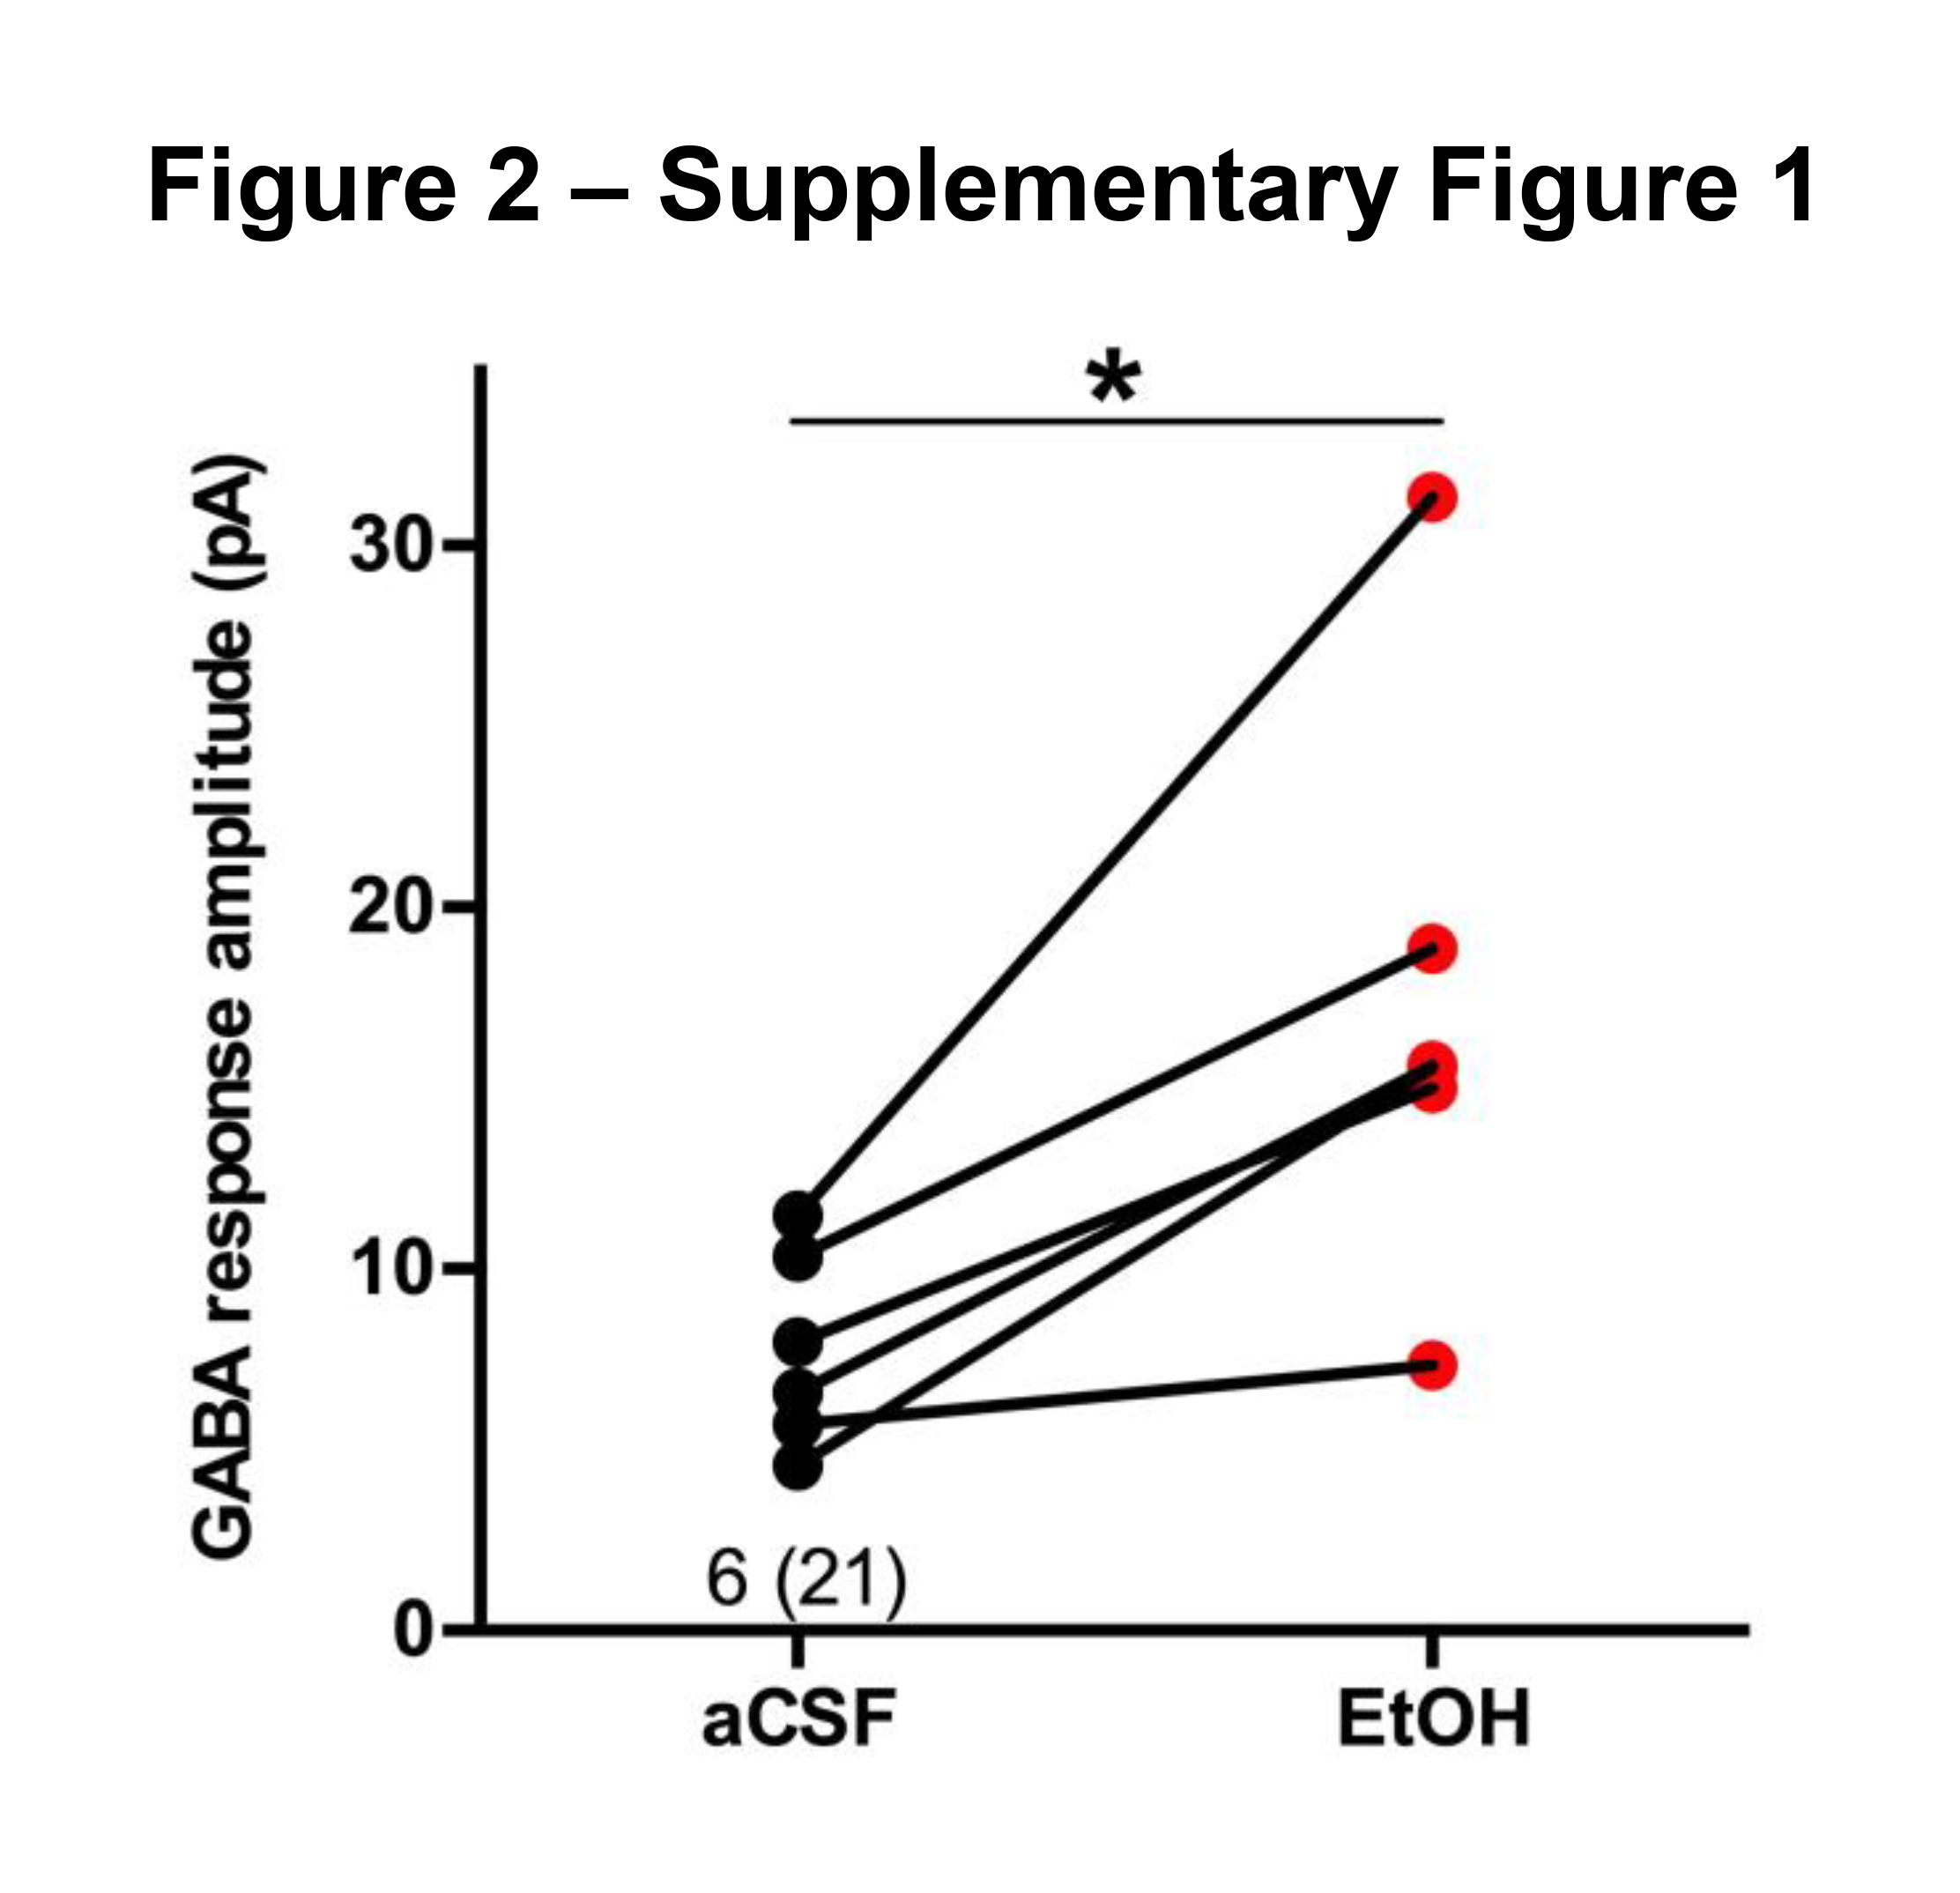

Supplement: supp [file elife-48648-supp-v1.zip › elife_poa_e48648_Figure_2_figure_supplement_1.tif]

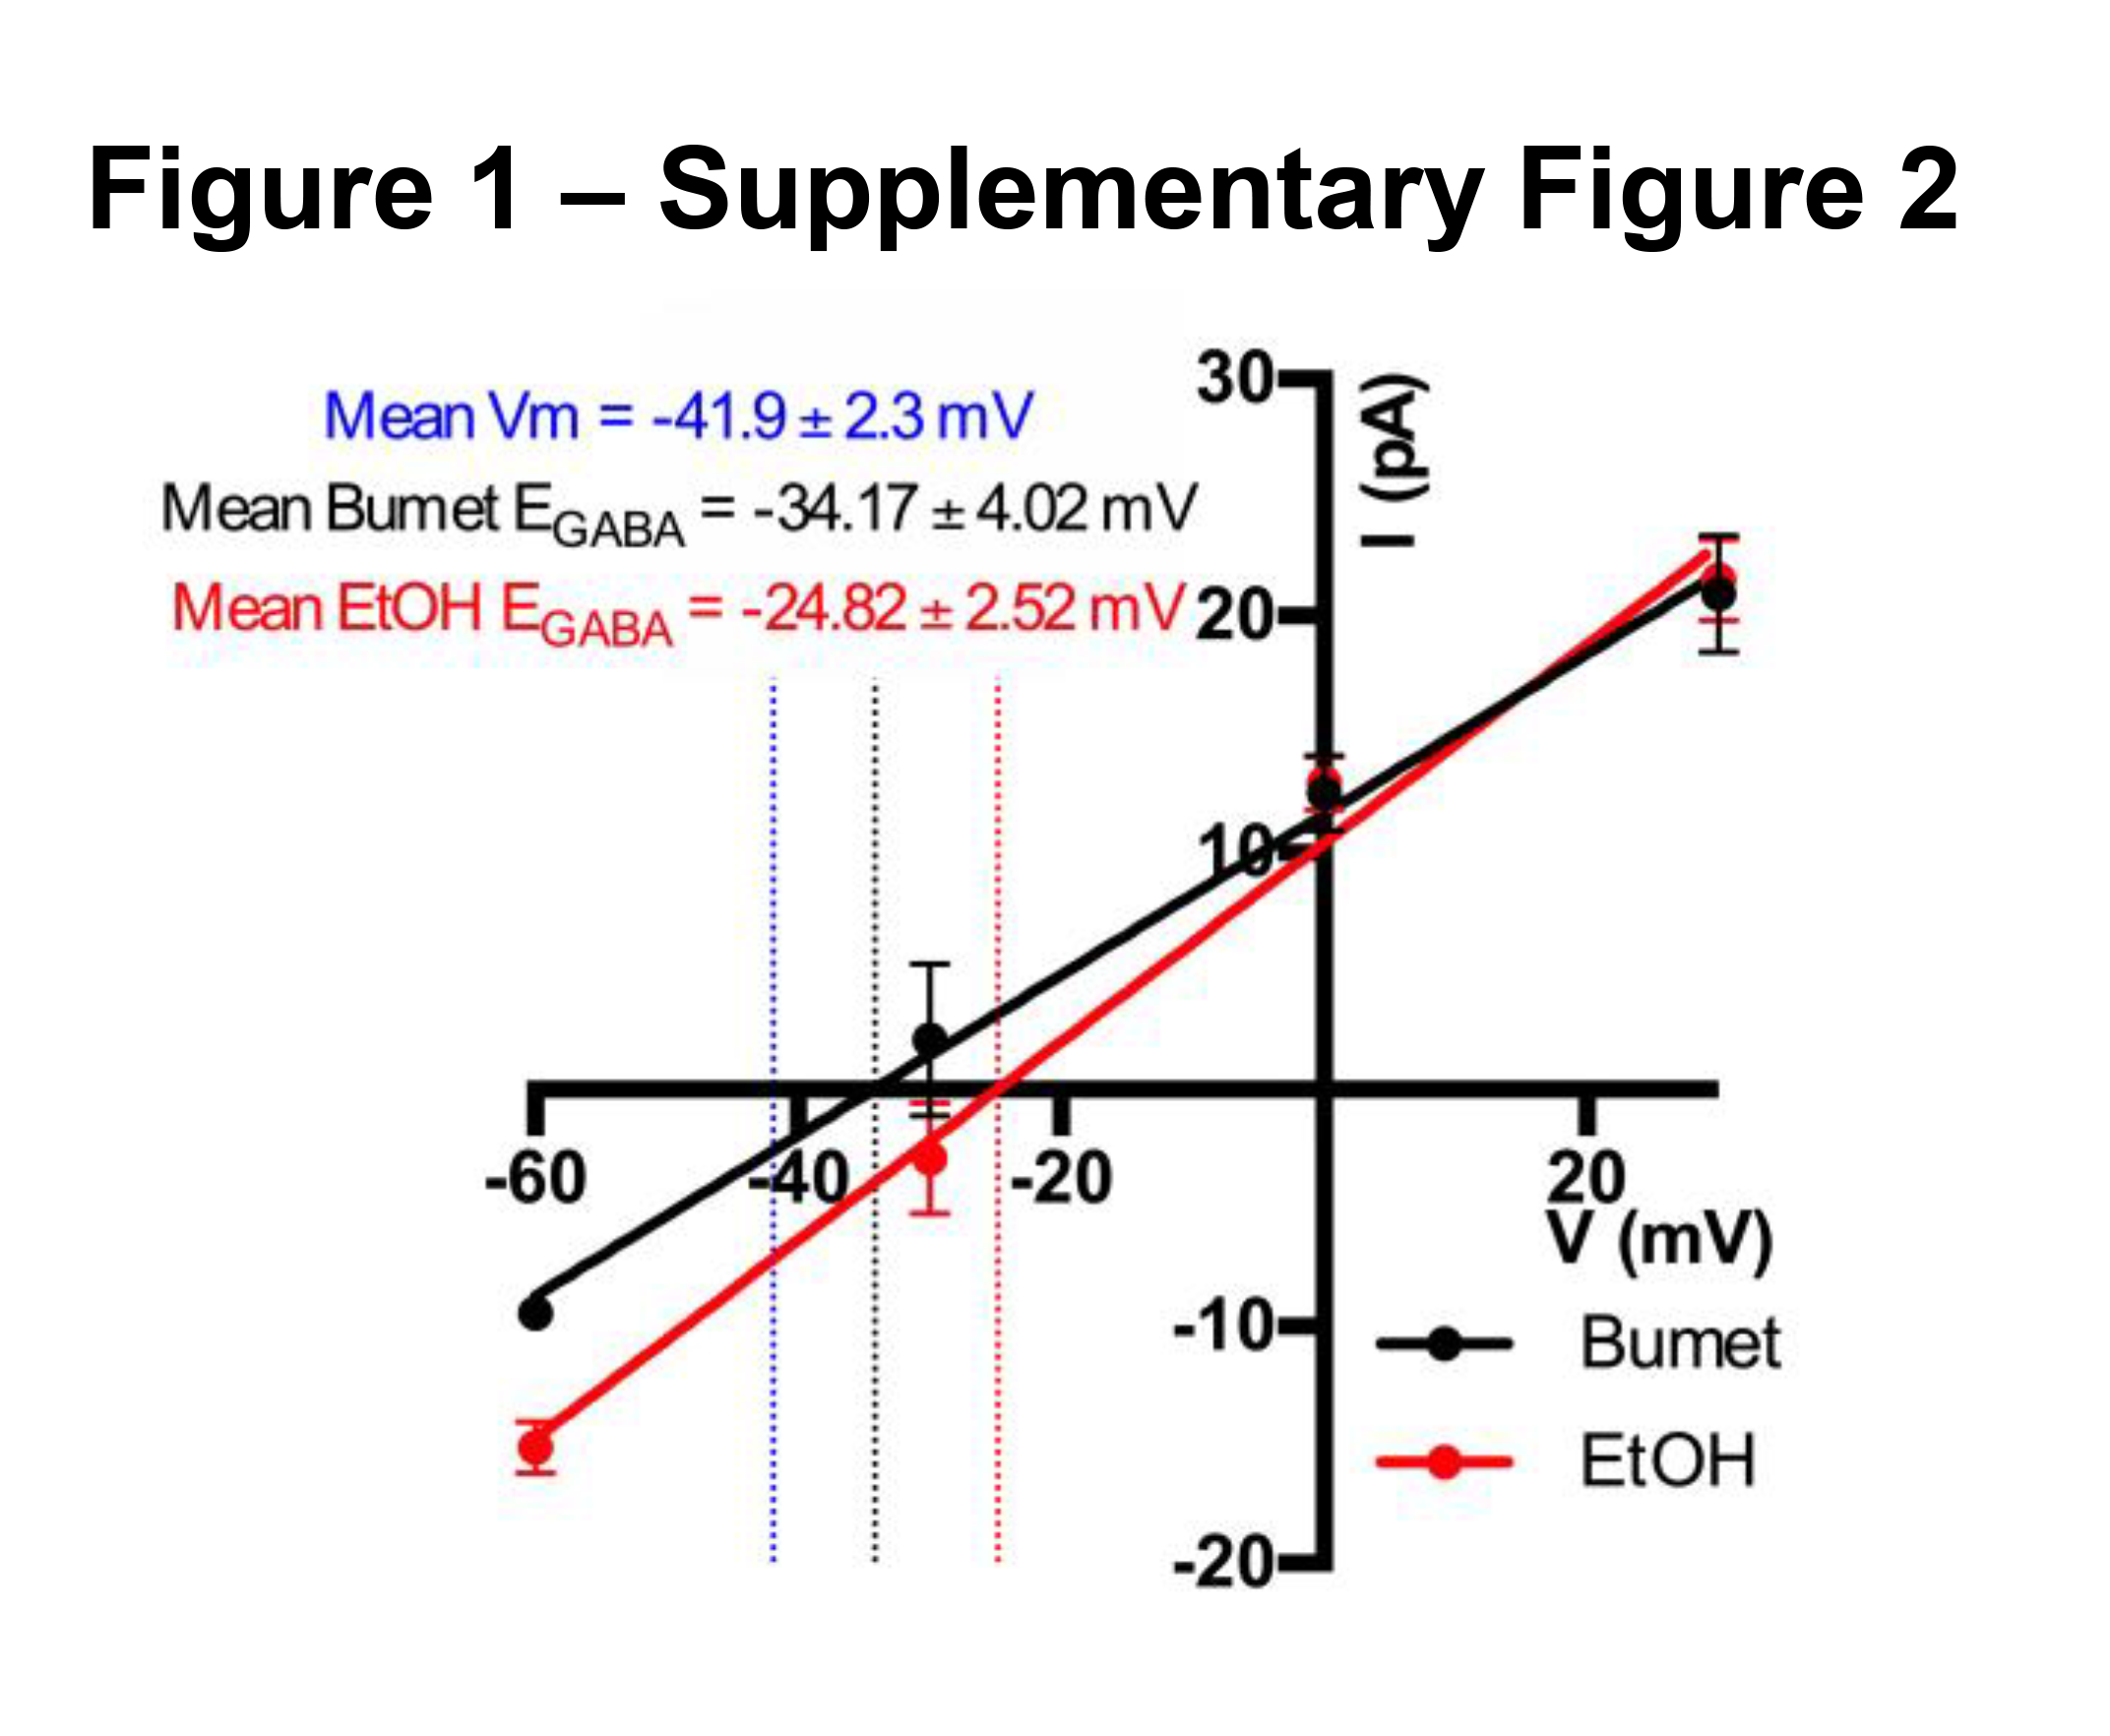

Supplement: supp [file elife-48648-supp-v1.zip › elife_poa_e48648_Figure_1_figure_supplement_2.tif]

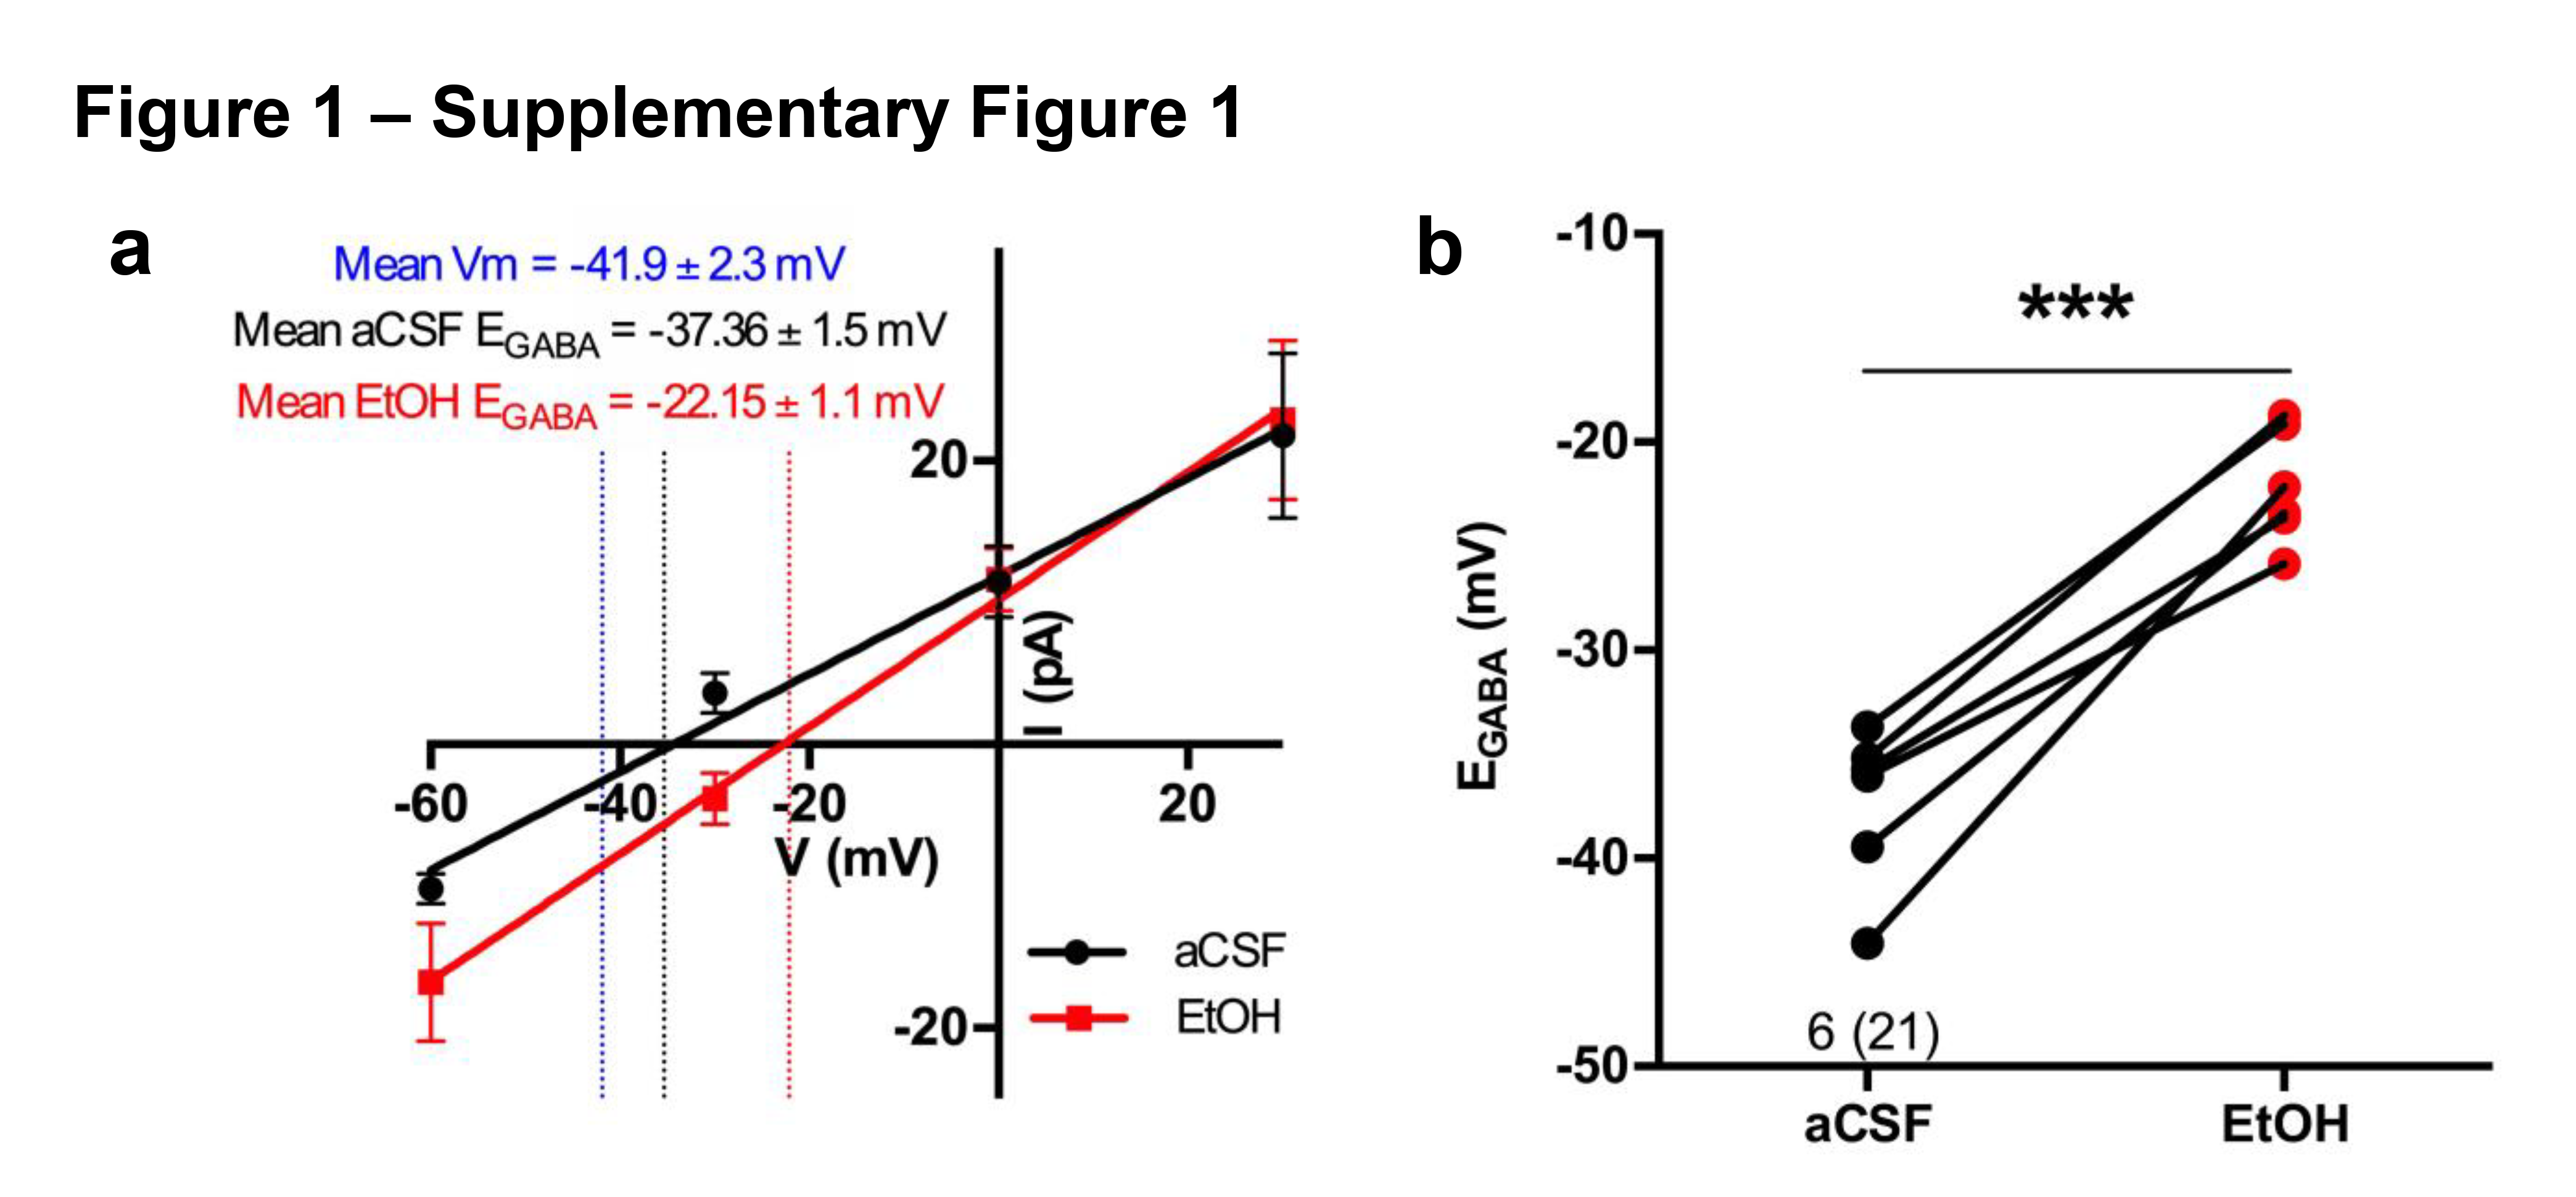

Supplement: supp [file elife-48648-supp-v1.zip › elife_poa_e48648_Figure_1_figure_supplement_1.tif]

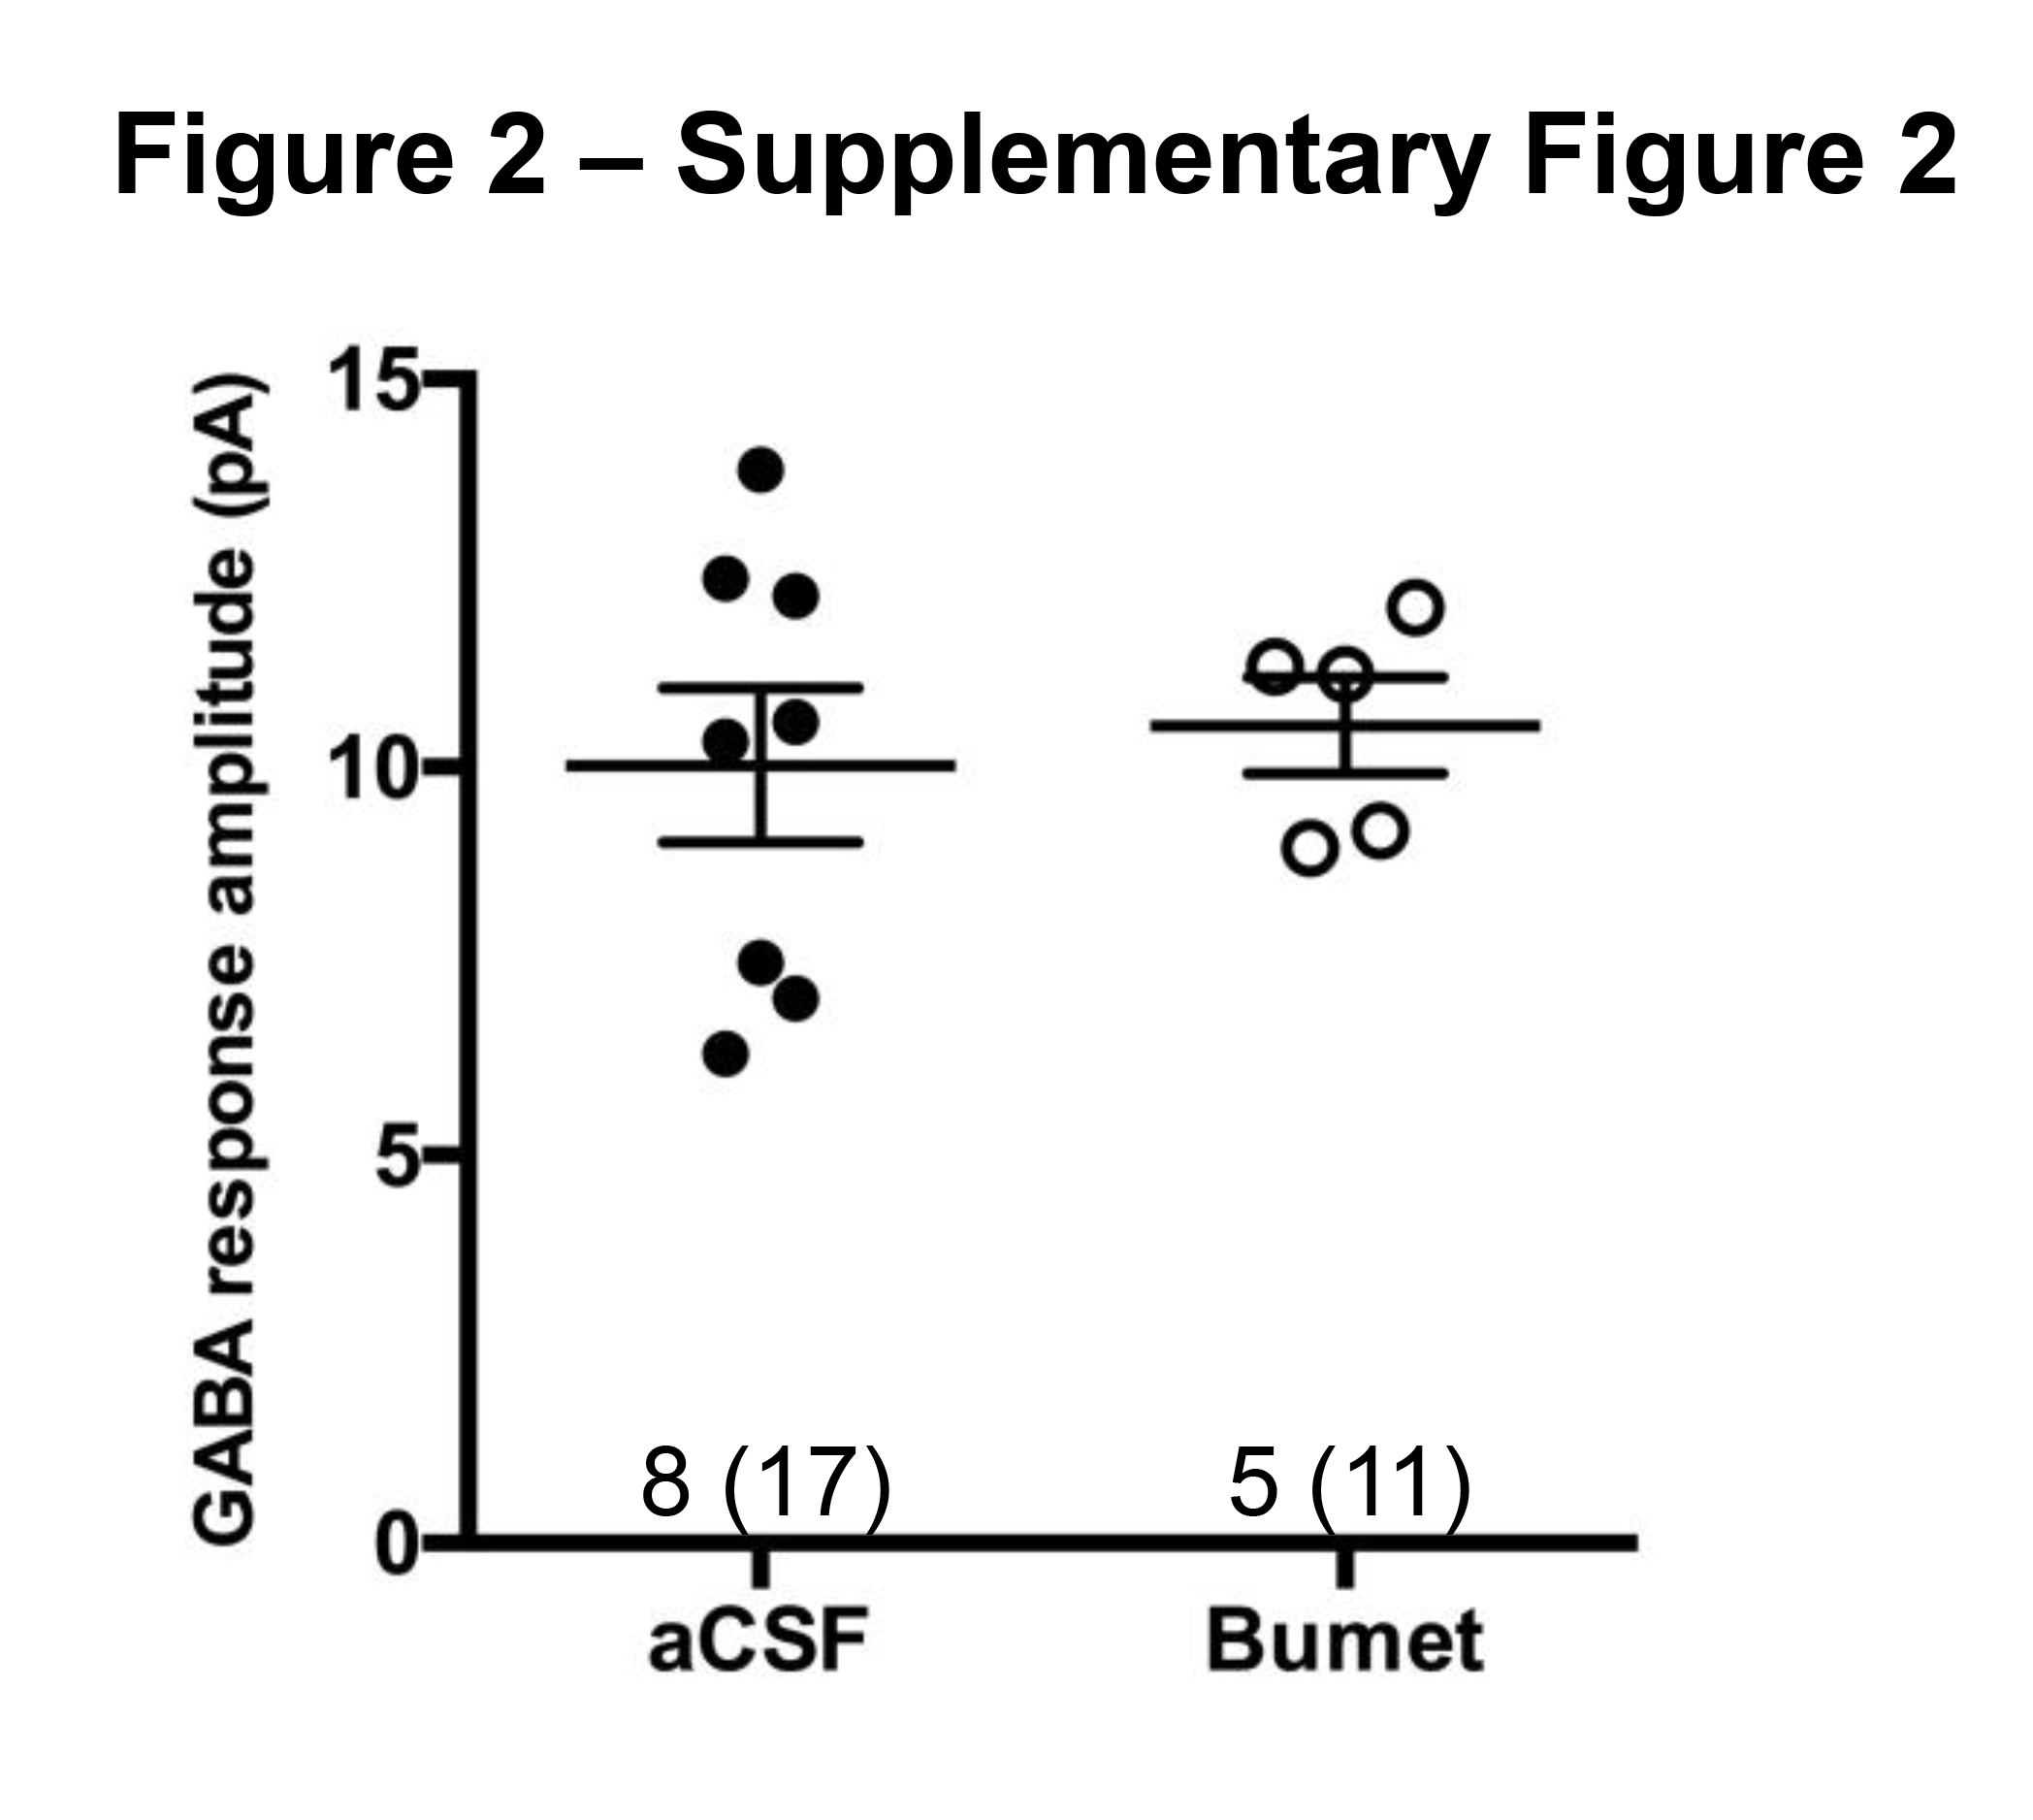

Supplement: supp [file elife-48648-supp-v1.zip › elife_poa_e48648_Figure_2_figure_supplement_2.tif]
